# Supplementary material for: Part 1 - Looking Back and Looking Around: How Parents, Coaches and Athletes See Psychosocial Development in Adolescent Performance Sport.
Source: Preprints.org preprint supplement (doi:10.20944/preprints202201.0038.v1), 2022-01-05
Supplement: Supplementary file 2 [file 1 - Participant Demographic Data Tables.docx]

| **Coach pseudonym** | **Age** | **Years coaching** | **Years at club** | **Former club player?** | **Current profession (or former if retired)** | **Socioeconomic status and ethnic origin** |
| --- | --- | --- | --- | --- | --- | --- |
| Jack | 72 | 45 | 17 | N/A Club co-founder | High school teacher | Retired middle class Professional  White British |
| George | 72 | 43 | 17 | N/A Club co-founder | High school deputy head teacher | Retired middle class Professional  White British |
| James | 35 | 10 | 10 | Yes | College teacher | Middle class  Professional  White British |
| Michael | 26 | 6 | 4 | No | Sport development officer | Working Class  Semi-professional  White British |
| Carl | 30 | 8 | 8 | Yes | Full time club coach | Working Class  Semi-professional  White British |

Table S1.1 Demographic data of coaches

| **Former parent pseudonym** | **Age** | **No of children at club** | **Years at the club** | **Years children out of the club** | **Level children played at** | **Socioeconomic status; ethnic origin; marital status** |
| --- | --- | --- | --- | --- | --- | --- |
| Philippa and Jerry  (interviewed together) | 57 and 58 | 3 | 12 | 7 | Junior and Senior National League | Upper middle class  Professional  White British/American  Married |
| Albert | 58 | 2 | 10 | 4 | Junior and Senior National League | Upper middle class  Professional  White British  Married |
| Damian | 57 | 1 | 6 | 13 | Junior and Senior National League | Lower middle class  Semi-professional  Black Caribbean  Married |
| Mark | 57 | 1 | 5 | 7 | Top End Community League[[1]](#footnote-1) | Upper middle class  Professional  White British  Married |
| Patrick | 58 | 2 | 12 | 7 | Junior and Senior National League | Upper middle class  Professional  White British  Married |
| Neil | 59 | 2 | 5 | 11 | Junior and Senior National League | Semi-skilled Working class  Manual worker  White British  Married |
| Eva | 62 | 1 | 7 | 6 | Junior and Senior National League | Semi-skilled Working class  Manual worker  Black Caribbean  Married (but husband still lives in Barbados) |
| Sandra | 56 | 2 | 12 | 7 | Junior and Senior National League | Semi-skilled Working class  Manual worker  White British  Divorced |

Table S1.2 Demographic data of former parents

| **Former player pseudonym** | **Age** | **Years at the club** | **Years out of the club** | **Level played at** | **Socioeconomic status; ethnic origin; marital status** |
| --- | --- | --- | --- | --- | --- |
| Charlie | 31 | 8 | 9 | Junior and Senior National League  USA College  UK Pro League | Upper middle class  Professional  White British/American  Single |
| Darren | 32 | 6 | 7 | Junior and Senior National League  UK Semi-Pro League | Lower middle class  Professional  White British  Single (in long term relationship)  (currently lives in China) |
| Jacob | 32 | 8 | 9 | Junior and Senior National League  USA College  UK Semi-Pro League | Upper middle class  Professional  White British  Married |
| Anthony | 32 | 3 | 9 | Junior and Senior National League  USA College  Europe Pro League | Upper middle class  Professional  Black African  Married  (currently lives in the USA) |
| Sid | 27 | 5 | 7 | Top End Community League  UK University League | Upper middle class  Professional  White British  Single |
| Steve | 31 | 7 | 6 | Junior and Senior National League  Europe Pro-League  UK Pro-League | Lower middle class  Professional  Black Caribbean  Single (in long term relationship)  Has a daughter (6 years old) |

Table S1.3 Demographic data of former players

| **Current parent pseudonym** | **Age** | **No of children at club** | **Years at the club** | **Involvement at club beyond parenting** | **Socioeconomic status; ethnic origin; marital status** |
| --- | --- | --- | --- | --- | --- |
| Jerome | 48 | 3 | 5 | Team manager  Mini-bus driver | Upper middle class  Professional  White British  Married |
| Thomas | 49 | 1 | 4 | None | Semi-skilled Working class  Manual worker  White British  Married |
| Will | 46 | 1 | 5 | None | Upper middle class  Professional  Black Caribbean  Married |
| Sam | 45 | 1 | 3 | Table official | Lower middle class  Semi-professional  White British  Married |
| James | 48 | 2 | 4 | Table official | Semi-skilled Working class  Manual worker  White British  Married |
| Emily | 47 | 3 | 7 | Team Manager  Table official | Upper middle class  Semi-professional  White British  Married |
| Chloe  (Transgender) | 45 | 1 | 3 | None | Upper middle class  Professional  White British  Single (in long term relationship) |
| Megan | 50 | 2 | 10 | Team manager  Table official  General volunteering | Skilled Working class  Manual worker  White British  Divorced |
| Jessica | 42 | 1 | 5 | None | Lower middle class  Semi-professional  Black African  Married |
| Sophie | 45 | 1 | 4 | Team manager | Upper middle class  Professional  White British  Married |

Table S1.4 Demographic data of current parents

| **Current player pseudonym** | **Age** | **Years at the club** | **Playing history** | **Socioeconomic status; ethnic origin;** |
| --- | --- | --- | --- | --- |
| Harry | 12 | 2 | Played community basketball elsewhere  Joined national league programme 2 years ago | Upper middle class  White British |
| Oliver | 13 | 1 | Played community basketball elsewhere  Joined national league programme 1 years ago | Lower middle class  White British |
| Alfie | 12 | 3 | Came through club community programme  Selected to national league 3 years ago | Upper middle class  Mixed race White British/Caribbean |
| Jamie | 13 | 3 | Came through club community programme  Selected to national league 3 years ago | Working class  White British |
| Tabo | 12 | 2 | Played community basketball elsewhere  Joined national league programme 2 years ago | Working class  Black African |
| Ethan | 15 | 4 | Played community basketball elsewhere  Joined national league programme 4 years ago | Lower middle class  Mixed race White British/Caribbean |
| Noah | 16 | 3 | Played community basketball elsewhere  Joined national league programme 3 years ago | Upper middle class  White British |
| Mikael | 15 | 2 | Migrated from another country  Joined national league programme 2 years ago | Working class  Black African |
| Liam | 16 | 4 | Came through club community programme  Selected to national league 4 years ago | Working class  White British |
| Jayden | 15 | 5 | Came through club community programme  Selected to national league 5 years ago | Upper middle class  White British |

Table S1.5 Demographic data of current players

1. Mark and his son Sid were chosen because, despite not reaching national league, Sid spent a high amount of time at the club. His experience as a ‘near-miss’ non-national league player was deemed valuable for the study. [↑](#footnote-ref-1)
